# Supplementary material for: Exploring the Lyapunov instability properties of high-dimensional atmospheric and climate models
Source: Copernicus journal article supplement (doi:10.5194/npg-25-387-2018), 2018-05-28
Supplement: Supplementary file 1 [file npg-25-387-2018-supplement.zip]

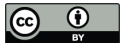

## *Supplement of*

# **Exploring the Lyapunov instability properties of high-dimensional atmospheric and climate models**

**Lesley De Cruz et al.**

*Correspondence to:* Lesley De Cruz ([lesley.deacruz@meteo.be](mailto:lesley.deacruz@meteo.be))

- [npg-25-387-2018-supplement-title-page.pdf](#)
- [lyapunov\\_spectra\\_MAOOAM](#)
  - dissipation
    - \* [10x10.txt](#)
    - \* [11x11.txt](#)
    - \* [2x4.txt](#)
    - \* [3x3.txt](#)
    - \* [4x4.txt](#)
    - \* [5x5.txt](#)
    - \* [6x6.txt](#)
    - \* [7x7.txt](#)
    - \* [8x8.txt](#)
    - \* [9x9.txt](#)
    - \* [oc-6x6\\_atm-7x7.txt](#)
    - \* [oc-6x6\\_atm-8x8.txt](#)
    - \* [oc-6x6\\_atm-9x9.txt](#)
    - \* [oc-7x7\\_atm-6x6.txt](#)
    - \* [oc-8x8\\_atm-6x6.txt](#)
    - \* [oc-9x9\\_atm-6x6.txt](#)
  - dissipation-reducedstress
    - \* [10x10.txt](#)
    - \* [11x11.txt](#)
    - \* [2x4.txt](#)
    - \* [3x3.txt](#)
    - \* [4x4.txt](#)
    - \* [5x5.txt](#)
    - \* [6x6.txt](#)

- \* 7x7.txt
- \* 8x8.txt
- \* 9x9.txt
- \* oc-6x6\_atm-7x7.txt
- \* oc-6x6\_atm-8x8.txt
- \* oc-6x6\_atm-9x9.txt
- \* oc-7x7\_atm-6x6.txt
- \* oc-8x8\_atm-6x6.txt
- \* oc-9x9\_atm-6x6.txt
- dissipationx10
  - \* 10x10.txt
  - \* 11x11.txt
  - \* 2x4.txt
  - \* 3x3.txt
  - \* 4x4.txt
  - \* 5x5.txt
  - \* 6x6.txt
  - \* 7x7.txt
  - \* 8x8.txt
  - \* 9x9.txt
  - \* oc-6x6\_atm-7x7.txt
  - \* oc-6x6\_atm-8x8.txt
  - \* oc-6x6\_atm-9x9.txt
  - \* oc-7x7\_atm-6x6.txt
  - \* oc-8x8\_atm-6x6.txt
  - \* oc-9x9\_atm-6x6.txt
- nodissip
  - \* 10x10.txt
  - \* 11x11.txt
  - \* 2x4.txt
  - \* 3x3.txt
  - \* 4x4.txt
  - \* 5x5.txt
  - \* 6x6.txt
  - \* 7x7.txt
  - \* 8x8.txt
  - \* 9x9.txt
  - \* oc-6x6\_atm-7x7.txt
  - \* oc-6x6\_atm-8x8.txt
  - \* oc-6x6\_atm-9x9.txt
  - \* oc-7x7\_atm-6x6.txt
  - \* oc-8x8\_atm-6x6.txt
  - \* oc-9x9\_atm-6x6.txt
- nodissip-reducedstress
  - \* 10x10.txt
  - \* 11x11.txt
  - \* 2x4.txt

- \* 3x3.txt
- \* 4x4.txt
- \* 5x5.txt
- \* 6x6.txt
- \* 7x7.txt
- \* 8x8.txt
- \* 9x9.txt
- \* oc-6x6\_atm-7x7.txt
- \* oc-6x6\_atm-8x8.txt
- \* oc-6x6\_atm-9x9.txt
- \* oc-7x7\_atm-6x6.txt
- \* oc-8x8\_atm-6x6.txt
- \* oc-9x9\_atm-6x6.txt
- readme.txt
- lyapunov\_spectra\_PUMA
  - 50K\_BLE.dat
  - 60K\_BLE.dat
  - readme.txt

The copyright of individual parts of the supplement might differ from the CC BY 4.0 License.
